# Supplementary material
Source: publisher figshare collection journal article supplement (https://acs.figshare.com/ndownloader/files/24111395)
Supplement: Supplementary file 1 [file 24111395]

## Supporting Information

### **Cu<sub>2</sub>O-CuSCN Nanocomposite as a Hole-Transport Material of Perovskite Solar Cells for the Enhanced Carrier Transport and Suppressed Interfacial Degradation**

*Jinhyun Kim,<sup>†</sup> Younghyun Lee,<sup>†</sup> Bumjin Gil,<sup>†</sup> Alan Jiwan Yun, Jaewon Kim, Hyungsub Woo, Kimin Park, and Byungwoo Park\**

Department of Materials Science and Engineering, Research Institute of Advanced Materials,  
Seoul National University, Seoul 08826, Korea

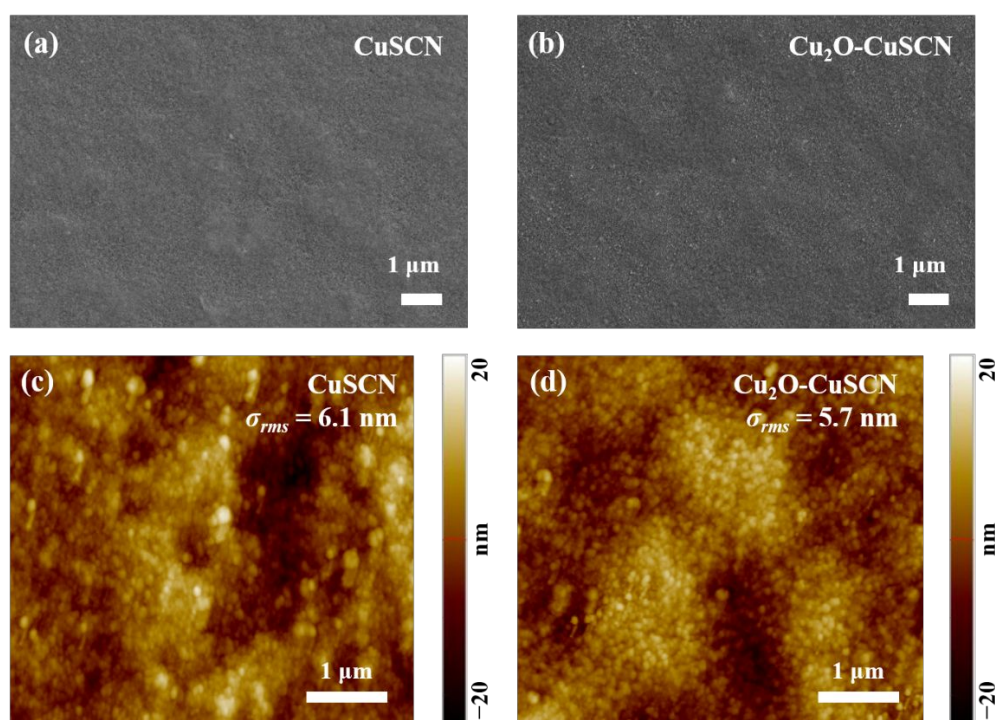

**Figure S1. Surface morphologies and roughnesses of different HTLs.** (a) SEM image of each HTL deposited on CsFAMA. (b) Topography of each HTL as obtained by AFM.

\* E-mail: [byungwoo@snu.ac.kr](mailto:byungwoo@snu.ac.kr); Phone: +82-2-880-8319; Fax: +82-2-885-9671.

<sup>†</sup> These authors contributed equally to this work.

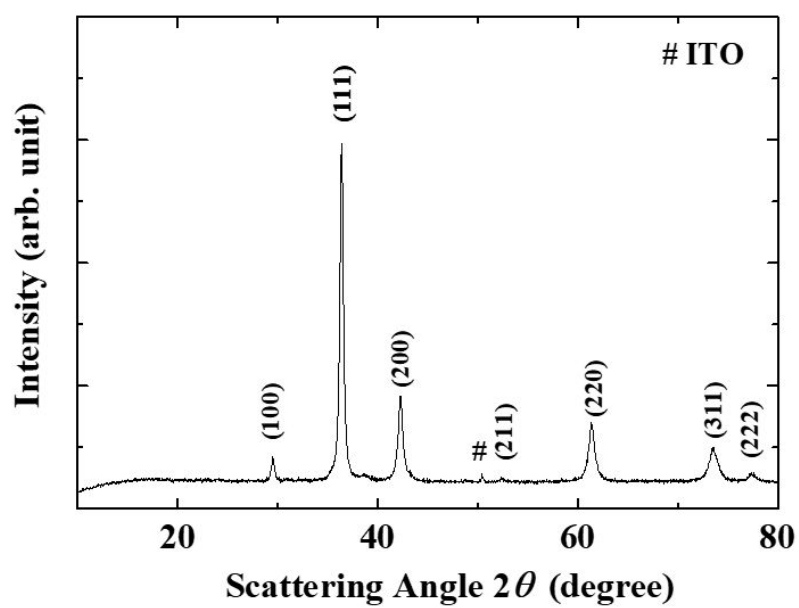

**Figure S2.** X-ray diffraction pattern of the Cu<sub>2</sub>O nanoparticles.

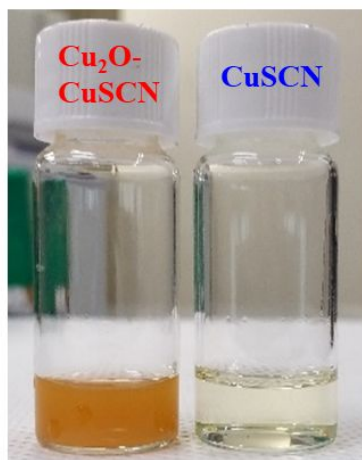

**Figure S3.** Optical images of the Cu<sub>2</sub>O-CuSCN and CuSCN solutions in diethyl sulfide.

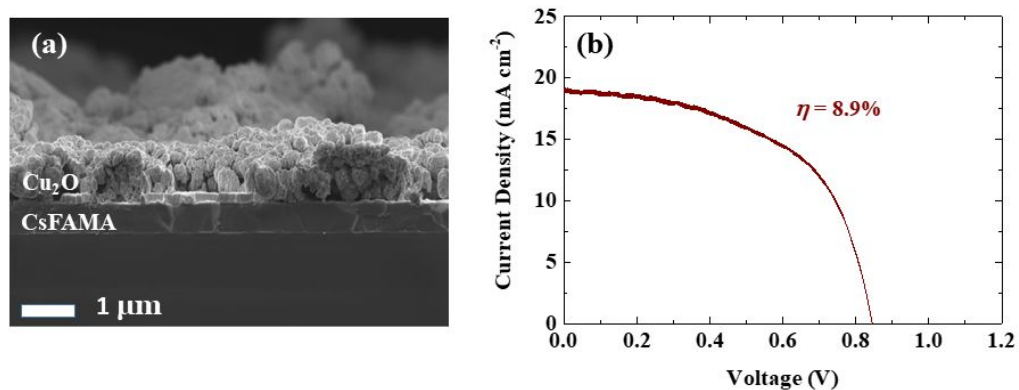

**Figure S4. The film morphology and solar-cell performance with only  $\text{Cu}_2\text{O}$  as an HTL.**

(a) Cross-sectional SEM image of the pure  $\text{Cu}_2\text{O}$  film deposited on  $\text{Cs}_{0.05}(\text{FA}_{0.85}\text{MA}_{0.15})_{0.95}\text{Pb}(\text{I}_{0.85}\text{Br}_{0.15})_3$  (CsFAMA) film. (b) A  $J$ - $V$  curve of the solar cell utilizing only  $\text{Cu}_2\text{O}$  as an HTL. The device parameters are:  $V_{OC} = 0.846$  V,  $J_{SC} = 18.9$   $\text{mA}/\text{cm}^2$ ,  $FF = 0.55$ , and  $\eta = 8.9\%$ .

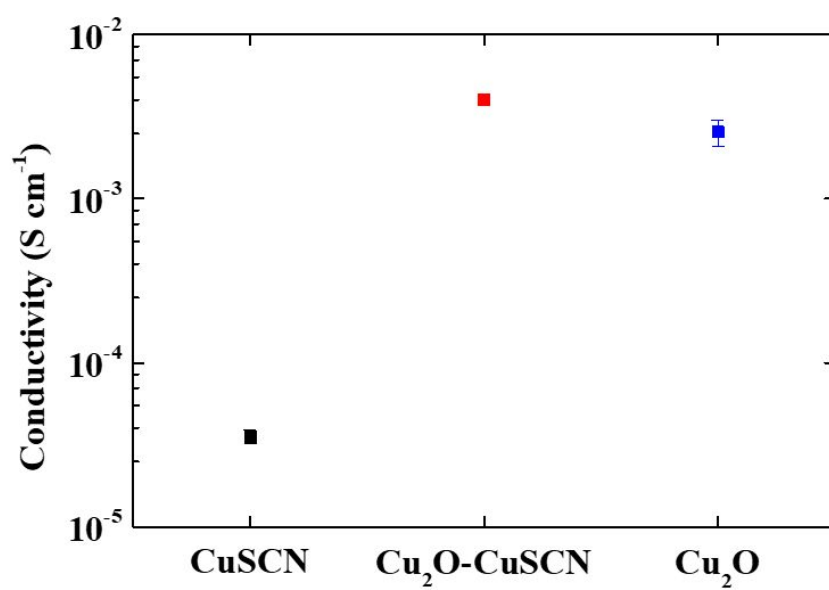

**Figure S5. Electrical properties of various HTLs.** In-plane conductivity is measured by four-point probe for CuSCN, Cu<sub>2</sub>O-CuSCN nanocomposite, and Cu<sub>2</sub>O films deposited on glass substrates.

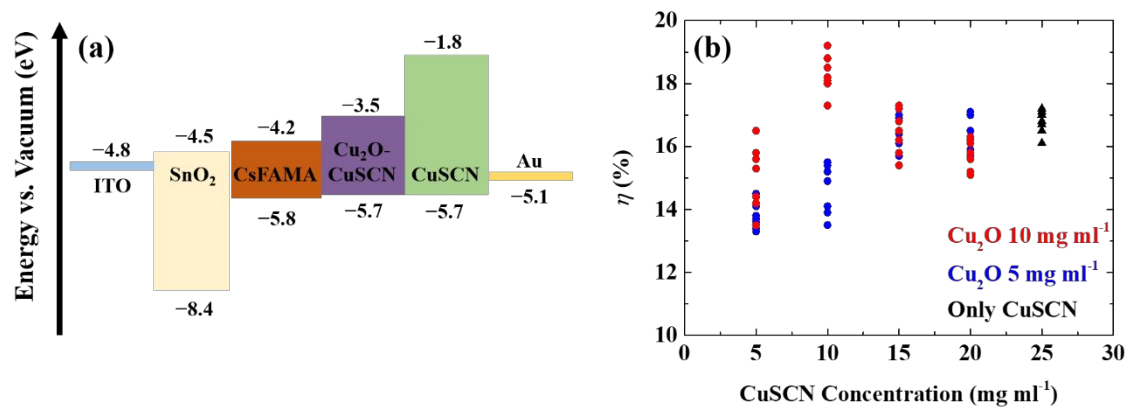

**Figure S6. The energy level diagram and optimization processes of nanocomposite-based solar cells.** (a) A schematic illustration of band structure of a solar cell. (b) Comparison of the solar-cell efficiencies at various  $\text{Cu}_2\text{O}$  and CuSCN concentrations. The optimum condition is 10 mg/ml for both  $\text{Cu}_2\text{O}$  and CuSCN.

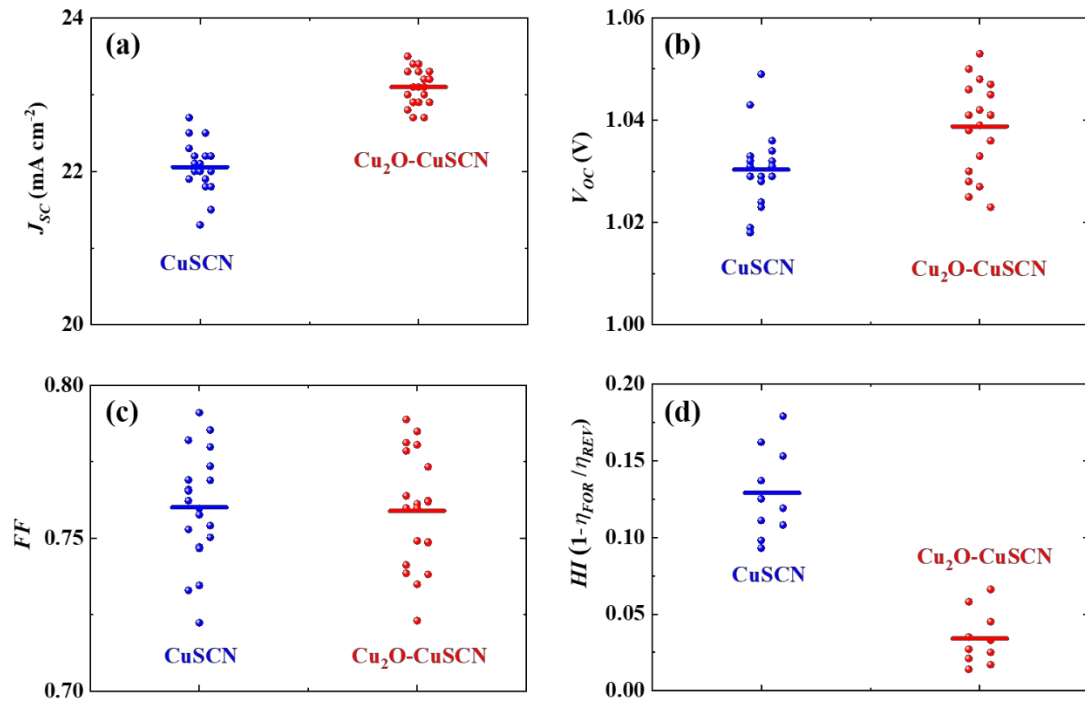

**Figure S7. Device performance of solar cells with different HTLs.** (a)  $J_{SC}$ , (b)  $V_{OC}$ , (c)  $FF$ , and (d) hysteresis index ( $HI = 1 - \eta_{FOR}/\eta_{REV}$ ) of the solar cells with Cu<sub>2</sub>O-CuSCN or CuSCN as an HTL, where lines represent average values.

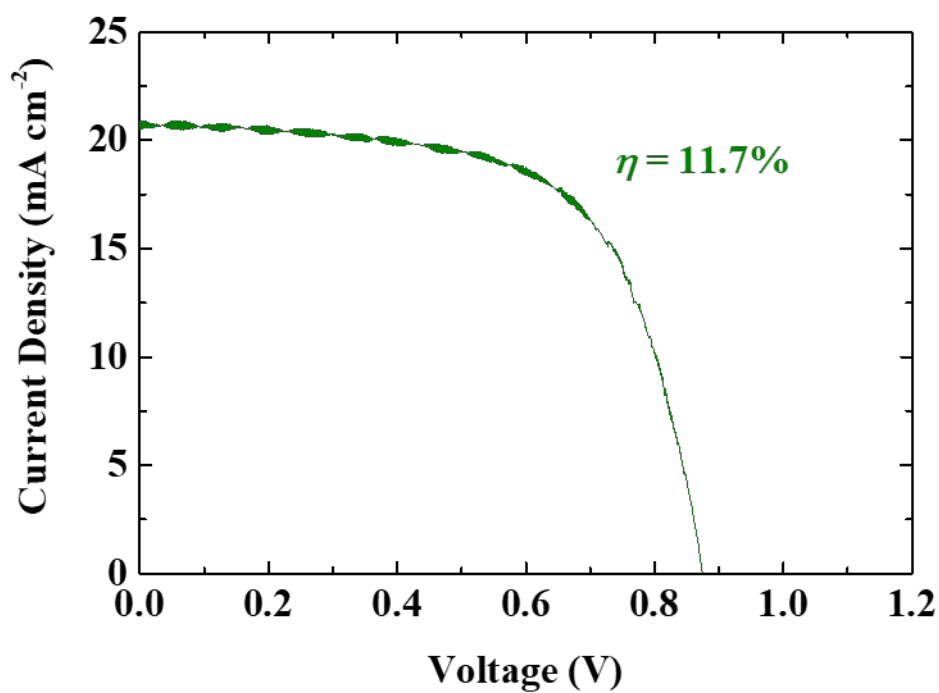

**Figure S8.** The  $J$ - $V$  plot of the solar cell with a sequentially-deposited bilayer HTL. The perovskite solar cell was fabricated by the following sequence: 10 mg/ml of Cu<sub>2</sub>O-dispersion solution was spin coated on a perovskite film, then 10 mg/ml of CuSCN solution was deposited subsequently. The device parameters are:  $V_{OC} = 0.875$  V,  $J_{SC} = 20.5$  mA/cm<sup>2</sup>,  $FF = 0.652$ , and  $\eta = 11.7\%$ .



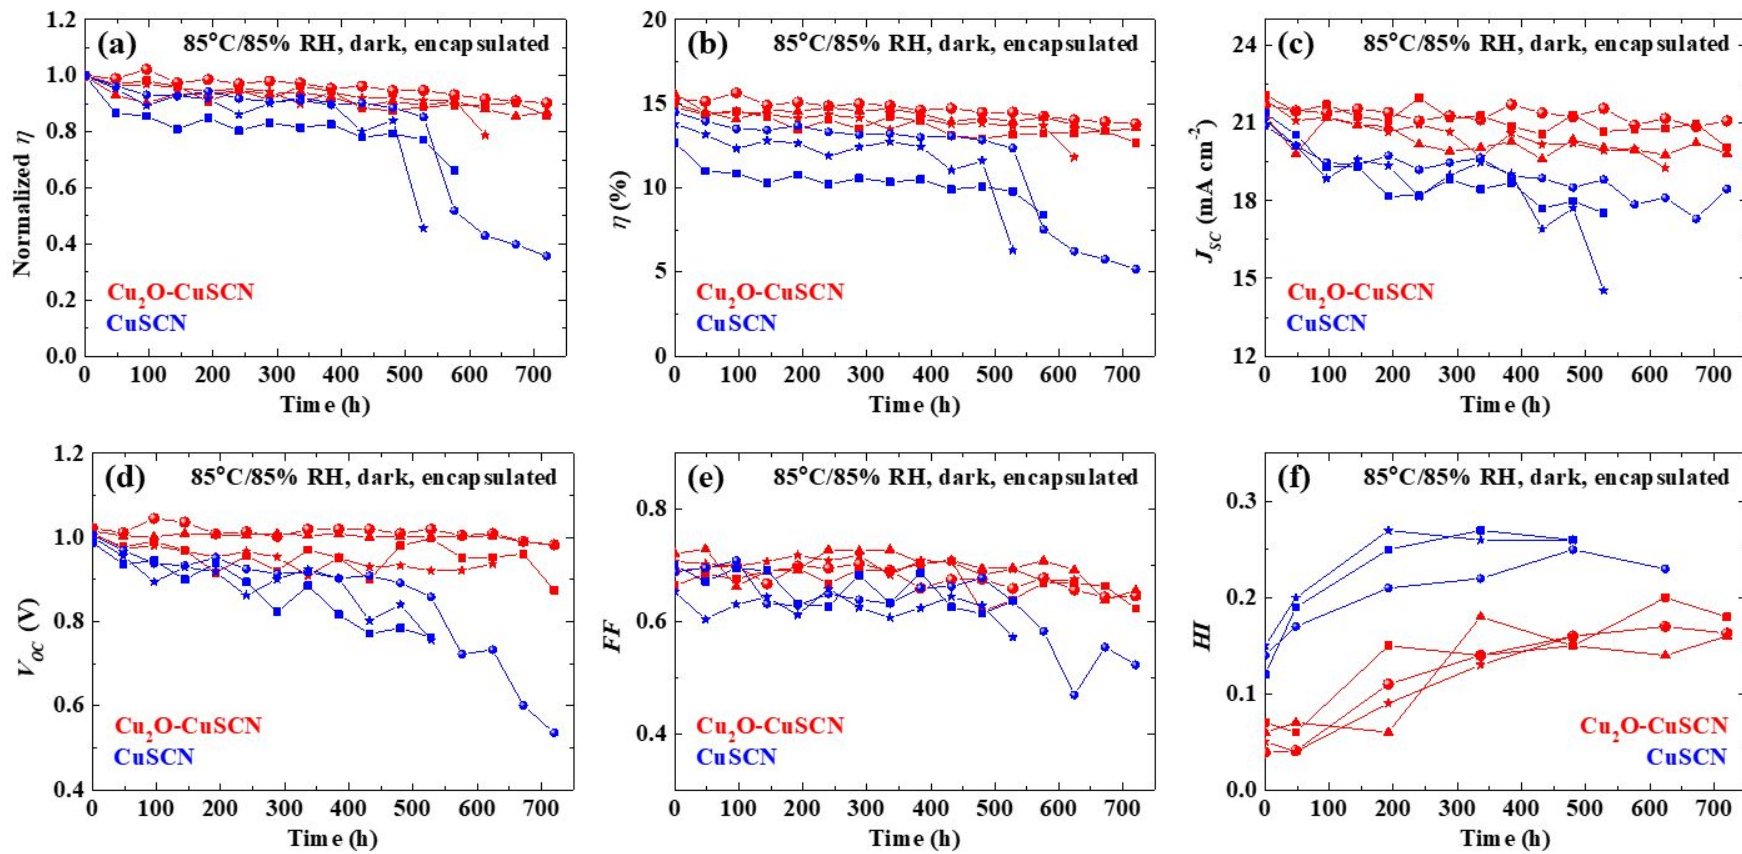

**Figure S9. Long-term stability for several devices with different HTLs.** (a) Normalized  $\eta$ , (b)  $\eta$ , (c)  $J_{sc}$ , (d)  $V_{oc}$ , (e)  $FF$ , and (h)  $HI$  of the solar cells stored under 85°C/85% RH with encapsulation in dark condition.
